# Supplementary material
Source: publisher figshare collection journal article supplement (https://geolsoc.figshare.com/ndownloader/files/30808992)
Supplement: Supplementary file 1 [file 30808992]

## Sheet: Notes
Supplemental Data for 'Thermal Metamorphism on the Moon as Recorded by the Granulite Suite'
Pernet-Fisher and Joy 2021
List of Apollo and Meteroties Granulite samples
Apollo										Meteorites
Sample Number:			Classification:							Sample Number and their assocated paired stone:							Classification:
Ferroan Granulites										North West Africa
12032			Lithic soil fragments							NWA 3163, 4881, 4483, 6275							feldspathic granulitic breccia
15418			Brecciated Granulite							NWA 5744, 8599, 8687, 10140, 10178, 10318, 10401, 11252							anorthositic-troctolite granulitic breccia
15459			Glass-matrix Regolith Breccia							NWA 482							feldspathic impact-melt breccia
67215			Fragmental Polymict Breccia							NWA 8022, 10082							feldspathic granulitic breccia
67455			Anorthositic Breccia							NWA 10713							feldspathic granulitic breccia
77017			Feldspathic Granulitic Impactite							NWA 6578							feldspathic granulitic breccia
78155			Feldspathic Granulitic Impactite							NWA 2200							feldspathic impact-melt breccia
76503			Lithic soil fragments
										Dar al Gani
Magnesian Granulites
										DaG 400, 1058							feldspathic regolith breccia
15364			Lithic soil							DaG 262, 996, 1042, 1048							feldspathic regolith breccia
67415			Noritic Anorthosite
67955			Noritic Anorthosite							Dhofar
60035			Polymict Anorthositic Breccia
67016			Feldspathic fragmental breccia							Dho 025 301 304 308							feldspathic regolith breccia
67915			Feldspathic Polymict Breccia							Dho 026 (457-468), 1669							feldspathic granulitic breccia
76230			Feldspathic Granulitic Impactite							Dho 081, 280, 910, 1224							feldspathic glassy-matrix fragmental breccia
79215			Feldspathic Granulitic Impactite							Dho 303 305, 306, 307, 309, 310, 311, 489, 730, 731, 908, 909, 911, 950, 1085							feldspathic regolith breccia
76503			Lithic soil							Dho 733, 1766							feldspathic granulitic breccia
72275			Fragmental Polymict Breccia
72559			Granoblastic Impactite							Antarctic
78527			Granulitic Noritic Breccia
73215			Aphanitic Impact Melt Breccia							QUE 93069, 94269							feldspathic regolith breccia
72255			Aphanitic Impact Melt Breccia							Allan Hills A81005							feldspathic regolith breccia
										MAC 88105, 88104							feldspathic regolith breccia
										Y791197							feldspathic regolith breccia
										Y981031							anorthosite-bearing basaltic regolith breccia
Classifications from the Lunar Sample Compdendium (Meyer 2011):										Classification from Lunar meteroties list (Korotev 2021):
https://curator.jsc.nasa.gov/lunar/lsc/index.cfm										http://meteorites.wustl.edu/lunar/moon_meteorites_list_alpha.htm

## Sheet: Apollo
		Ferroan Granulites
Sample Number		12032		15418								15459			67215				67455			77017																78155										76503
Split Number		,277		,217dm	,217	,219	,220	,221	,221	sawdust		,288	,309		,7	,8A	,8B		,120	,120		,151G	,151	,152	,153	,154	,155	,2	,57	,57D	,57G	,186 A	,186 B	,188 A	,188 B	,2		,137	,2	,3	,127	,164 A	,164 B	,166 A	,166 B	,57		,7074	,7084
(wt. %)	SiO2	43.4258																	44.8	44.4																44.09												45.5	43.9
	TiO2	1.50129		0.41	0.25			0.25	0.37	0.3					0.43	0.33			0.23			1.17	0.7		0.41			0.41	0.75	5.3	0.35					0.41		0.32	0.27	0.22	0.28					0.22		0.26	0.19
	Al2O3	24.1856		25.7	26.8			28.4	26.4	26.4					24.3	27.4			28.96	34.5		24.9	24.7		24.9			26.59	26	18.9	27.1					26.59		26	25.9	26.2	25.3					26.2		25.9	25.6
	FeO	7.84765		4.9	6.44	6.84	6.52	5.11	7.5	7		4.22	5.82		7.95	6.39	6.43		5.04	0.61		6.34	5.99	6.18	6.21	6.02	6.02	6.19	6.2	12.1	5.7					6.19		5.62	5.82	5.3	5.63					5.3		5.41	7.59
	MgO	8.12518		6.4	5.5			4.3	5.3	6					6.8	5.3			3.87	0.51		6.2	6.5		6.1			6.06	6	8	6					6.06		6.2	6.33	6.2	6.42					6.2		6.27	6.12
	CaO	14.1319		15.4	15.6	15.4	15.7	16.5	15.8	15.7		16.3	12.6		14.9	16.2	15.8		17.32	19.83		15.5	14.9	15.3	15.4	14.9	15	15.43	14.5	11.7	15.7					15.43		15.2	15.2	15.2	15.2					15.2		16.1	15
	Na2O	0.36396		0.39	0.29	0.27	0.27	0.3	0.28	0.29		0.384	0.578		0.3	0.3	0.29		0.31	0.33		0.36	0.33	0.34	0.34	0.34	0.33	0.3	0.31	0.39	0.39					0.3		0.39	0.33	0.39	0.39					0.39		0.32	0.37
	K2O	0.030115																	0.02	0.02								0.05	0.05	0.1	0.076					0.06				0.084						0.07		0.04	0.02
(ppm)	Sc	11.6		9.11	11.8	13.4	13.5	10.5	12.7	12		6.6	7.17		17.3	12.8	13.2					15.1	13.4	12	13.1	11.8	115		12	36	9.8	11.02	11.4	11.76	11.91			12.9		11	13.3	13.33	13.84	12.9	13.14	11		13.7	10.1
	V																																													30
	Cr	740		818	690	870	882	639	1920	1920		390	660		978	755	736		0.03	0.005		1018	1092	853	932	986	839	881	960	1986	863					881		965	1008	822	960					821		933	783
	Mn	740		594	733			600	667										54	77								620	659	1202	597					620				589						6.2		542	852
	Co	36		15.7	11	13.5	14.7	7.8	77	70		6.09	18		13.6	12	14.3					28.5	24.8	27	25.2	24.9	24.6		24	27	23	30.8	27.3	26.5	27			15.8		14	14	14.9	15.6	14.7	15.3	14		23.5	42
	Ni	160		125	36	65	45	26		700			88		45	26	48					360	300	312	297	296	290		290	290	300	372	312	298	300			100		90	80	67	83	61	73	90		275	630
	Rb																		0.634	0.706		165	155	170	147	151	150	142								1.3		165	147		141								2.1
	Sr	195		161	138	150	135	149				170	170		104	150	147		144	161								1.31				144	140	150	150	141			2.06		2.01	137	144	144	152			146	159
	Cs			0.11	0.05	0.05						0.034	0.073			0.072	0.063					0.1	0.07	0.09	0.11	0.06	0.05											0.103			0.11							0.08
	Ba	47		100	19	15	14	15	70	30		30	160		20	16	16		13.2	11.5		45	34	45	46	47	50	49	30	70	40	49	45	51	47	49		61	58.8	50	64	59	64	59	62	50		34	29
	La	3.9		8.02	0.759	0.756	0.812	0.719	1.2	1.6		2.36	8.35		0.867	1.576	1.427					2.76	1.68	3.17	3.46	2.69	2.4	3.48	3.3	6.4	3.6	3.81	3.26	3.61	4.14	3.48		3.98	4.02	4.3	4.28	3.99	3.96	3.93	3.85	4.3		2.29	0.77
	Ce	10.4		20.8	2.1	2.05	2.22	1.86		4		6.26	20.7		2.67	4.3	4		2.47	0.513		7.1	4.3	8.3	9.2	6.6	5.7	8.9	9	22	10	9.6	8.3	9.1	10.6	8.9		9.9	10.2	12	11.3	10	10	9.8	9.6	12		6.5	1.7
	Nd	5.9		12.5	1.4	1.6	1.2	1.3		3		4.1	13			3	2.7		1.88	0.33		4.5	2.9	5	5.7	4	3.4	5.56	5	18	5	5.4	4.7	6.4	7	5.56		5.7	6.3	8	7.3	6.1	5.2	5.3	6.2	8			1.5
	Sm	2		3.74	0.485	0.499	0.541		0.69	0.75		1.12	3.41		0.6	0.855	0.827		0.571	0.112		1.61	0.984	1.621	1.824	1.258	1.164	1.6	1.5	5.9	1.7	1.74	1.55	1.78	2.06	1.6		1.74	1.81	1.9	1.69	1.8	1.82	1.78	1.78	1.9		1.42	0.29
	Eu	1.09		0.911	0.697	0.698	0.699	0.696	0.73	0.726		0.82	1.34		0.74	0.726	0.702		0.745	0.727		0.835	0.75	0.765	0.762	0.74	0.745	0.794	0.78	1.42	0.8	0.8	0.8	0.8	0.82	0.794		0.835	0.87	0.9	0.862	0.88	0.87	0.87	0.86	0.9		0.77	0.82
	Gd																																			2.01
	Tb	0.49		0.88	0.129	0.149	0.15	0.129	0.18	0.2		0.224	0.74		0.17	0.199	0.25					0.41	0.235	0.403	0.44	0.29	0.295		0.3	1.3	0.3	0.37	0.33	0.39	0.44			0.41		0.35	0.39	0.38	0.41	0.39	0.38	0.35		0.35	0.07
	Dy	3.8																	1.01	0.249																2.34										2.3
	Ho	0.68
	Er																		0.642	0.118																1.5
	Yb	1.82		2.9	0.593	0.628	0.65	0.55	0.81	0.8		0.75	2.8		0.77	0.752	0.794		0.632	0.135		1.57	1.06	1.6	1.61	1.26	1.28	1.5	1.6	5.1	1.4	1.5	1.41	1.62	1.81	1.5		1.57	1.73	1.7	1.83	1.7	1.76	1.71	1.68	1.7		1.57	0.59
	Lu	0.283		0.444	0.094	0.102	0.105	0.085	0.12	0.12		0.119	0.448		0.121	0.125	0.132		0.087	0.0245		0.237	0.163	0.24	0.248	0.193	0.203		0.21	0.66	0.18	0.212	0.197	0.224	0.248	0.23		0.244	0.259	0.23	0.27	0.238	0.248	0.24	0.241	0.23		0.218	0.091
	Zr	177		110	25	50	50		180			40	100			25						40	30	38	50	32	48	59.1		200		47	45	50	51	59.1		48			54	50	47	40	49			38
	Hf	1.68		2.78	0.36	0.4	0.42	0.32	0.8	0.35		0.74	2.65		0.35	0.8	1.68					1.57	0.8	1.1	1.27	0.89	1.16	1.6	1.5	4.9	1	1.5	1.48	1.25	1.45	1.6		1.42		1.4	1.49	1.39	1.5	1.44	1.37	1.4		0.84	0.28
	Ta	0.28		0.32	0.033	0.031	0.04	0.026	0.09	0.05		0.11	0.395		0.05	0.125	0.147					0.28	0.103	0.112	0.152	0.128	0.148		0.22	0.85	0.14	0.37	0.25	0.18	0.2			0.22		0.23	0.25	0.21	0.21	0.2	0.2	0.23		0.04	0.03
	Th	0.93		1.27	0.046	0.049	0.064	0.024				0.258	0.83			0.096	0.15					0.47	0.52	0.52	0.72	0.84	0.71		0.4	0.6		0.91	0.7	0.68	0.88			0.86	1.013	0.9	0.84	0.9	0.9	0.92	0.91	0.9		0.26	0.03
	U	0.21		0.33								0.064	0.17		0.03	0.032	0.043					0.11	0.05	0.18	0.17	0.13	0.06	0.22				0.27	0.21	0.2	0.25	0.22		0.25	0.28	0.4	0.24	0.28	0.27	0.29	0.27	0.4		0.16
(ppb)	Os	2.01
	Ir	1.57		3.8	2.2	1.8	1	1								1.1	0.8					15	14	13	13	13	13		10	9	10	15.8	14.7	13.7	13.5			8			3.9	3.6	3.7	3.6	4.7			13	17
	Ru
	Pt
	Rh
	Pd
	Au	0.45		1.6						3												6.2	4.1	4.8	3.5	7.9	3.5		3	3	3	5.2	4.8	4.3	4.1						0.68							6.3	6.6
	Re	149
Reference		Warren 1990		Lindstrom and Lindstrom 1986	Lindstrom and Lindstrom 1986	Lindstrom and Lindstrom 1986	Lindstrom and Lindstrom 1986	Lindstrom and Lindstrom 1986	Lindstrom and Lindstrom 1986	Lindstrom and Lindstrom 1986		Lindstrom et al 1988	Lindstrom et al 1988		Lindstrom and Lindstrom 1986	Lindstrom and Lindstrom 1986	Lindstrom and Lindstrom 1986		Lindstrom et al 1977	Lindstrom et al 1977		Lindstrom and Lindstrom 1986	Lindstrom and Lindstrom 1986	Lindstrom and Lindstrom 1986	Lindstrom and Lindstrom 1986	Lindstrom and Lindstrom 1986	Lindstrom and Lindstrom 1986	Lindstrom and Lindstrom 1986	Lindstrom and Lindstrom 1986	Lindstrom and Lindstrom 1986	Lindstrom and Lindstrom 1986	Hudgins et al 2008	Hudgins et al 2008	Hudgins et al 2008	Hudgins et al 2008	Hubbard et al 1974		Lindstrom and Lindstrom 1986	Lindstrom and Lindstrom 1986	Lindstrom and Lindstrom 1986	Lindstrom and Lindstrom 1986	Hudgins et al 2008	Hudgins et al 2008	Hudgins et al 2008	Hudgins et al 2008	Laul and Schmitt 73		Jolliff et al 1996	Jolliff et al 1996
Method		INAA		INAA	INAA	INAA	INAA	INAA	INAA	INAA		INAA	INAA		INAA	INAA	INAA		ID	ID		INAA	INAA	INAA	INAA	INAA	INAA	INAA	INAA	INAA	INAA	INAA	INAA	INAA	INAA	XRF major elements; ID trace elements		INAA	INAA	INAA	INAA	INAA	INAA	INAA	INAA	INAA		INAA	INAA
Mass (mg)		81		not reported	not reported	not reported	not reported	not reported	not reported	not reported		not reported	not reported		not reported	not reported	not reported		not reported	not reported		not reported	not reported	not reported	not reported	not reported	not reported	not reported	not reported	not reported	not reported	100-150	100-150	100-150	100-150	46		not reported	not reported	not reported	not reported	not reported	100-150	100-150	100-150	568		12.25	17.61
[truncated: 68 more columns]

## Sheet: Meteorites
Sample Number			ALHA 81005										QUE 93069						Y91197													MAC 88105,W3			DaG 262				DaG400					NWA 482		NWA3163			NWA 4483
Split Number			bulk	clast	A1	A3	,33	,52	,53	,54	,56		bulk	bulk	,8A	,8B	,14		bulk	bulk	bulk	bulk	bulk	bulk	bulk	bulk	bulk	bulk	bulk			,62a	,62b
(wt. %)	SiO2				44.55	45.03									44.7114	44.9253	44.7114												44.9						44.2835	44.2835	43.8		43.5	41.42		42.9999		43.9	44.9253	45.7	45.1	45.1
	TiO2		0.3	0.3	0.15	0.15									0.290237	0.260213	0.248536		0.367	0.284					0.3	0.32			0.4						0.250204	0.183483	0.2	0.22	0.18	0.173	0.18	0.140114		0.16	0.183483	0.19	0.19	0.19
	Al2O3		26.3	25.9	21.41	24.06									29.2867	28.5309	28.153		25.12	26.63					27.7	26			27.3			32.8767	33.9		27.9641	27.3973	28.4	27.5	28.8	27.76	29.2	27.0194		29.4	29.0978	24	27.2	27.2
	FeO		5.6	5.9	6.15	4.48	4.96	4.56	5.06	5.14	4.197		3.78	4.46	4.16822	4.12963	4.38692		6.497	5.699	5.98	6.06	6.27	5.99	6.7	6.8	6.561	6.394	5.71			2.99752	3.28054		4.51557	4.3226	4.47	4.4	3.62	3.61	3.78	3.71795		3.8	3.89806	8.48	5.84	5.84
	MgO		8	9	15.31	11.68									4.47687	4.37738	4.32764		7.048	5.97					5.8	7.7			5.76				9.28536		5.37224	5.3225	5.5	5.21	4.62	4.84	5.14	4.80849		4.28	4.12867	7.44	5.01	5.01
	CaO		15.2	16.7	12.4	13.98	13.3204	14.6636	12.3409	12.5648	13.6142			16.3	15.3912	16.0908	16.6505		15.95	15.11	15	15.1	14.9	14.8	15.3	15.5			15.86			18.7493	19.5888		16.3706	17.3501	17.1	16.5	18.44	17.24	17.4	19.8686		18.47	16.6505	13.8	16.1	16.1
	Na2O		0.31	0.31	0.2	0.22	0.246549	0.265017	0.231317	0.218511	0.307344		0.3	0.355	0.322172	0.328812	0.33301		0.325	0.315	0.324	0.334	0.331	0.331	0.34	0.32	0.337	0.337	0.3			0.354524	0.386876		0.349132	0.33026	0.35	0.35	0.34	0.387	0.32	0.31678		0.26	0.380136	0.26	0.288	0.288
	K2O		0.025	0.02	0.01	0.01							0.021		0.0349334	0.0397518	0.0265012		0.035	0.028	0.025	0.027	0.023	0.023	0.028	0.026	0.029	0.029	0.028			0.0266217	0.0156598		0.0674576	0.11458	0.052	0.05	0.09	0.077	0.07	0.088968		0.035	0.04044	0.02	0.023	0.023
(ppm)	Sc		9.5	9	8.5	6.1	9.26	7.9	7.6	9.28	6.38		7.81	7.75	7.2	7.2	7.4		16.5	12.5	12.87	13.78	14.02	12.82	13.5	12.7	12.6	12	11.7			5.5	5.8		8.4	8	7.67	7.85	5.99	5.69	5.4	6.4		6.93	7.1	14.3	12.6	12.6	11.2
	V		25	25	24	16									29	19	17		39	30					30	24									10	26				18.1		23			16
	Cr		182.695	175.387	648.837	205.729	1240	1144	119	1322	1091		626	603	774.625	818.472	803.856		1034	880	940	933	938	906	855.3	780	930	880	865			390	420		964.627	906.165	640	639	520	527	550	730.778		519	745.394	656	1025	1025	889
	Mn		534	573	505.52	505.52							540		4182	3563	3408		720	651					674	651	635	666	929			320	340		3873	3718	465		542	534	387	4182		387	3408	821.47	575.029	575.029
	Co		20	19	20	9	21.22	19.4	25.24	18.16	20.87		25.1	22	22.2	21.2	21.9		16.9	18.4	21.6	17.1	19.4	19.2	19.8		26.2	24.2	5.51			17	20		22.2	17.9	20.1	22	13.84	15.3	14	15.1		13.21	14.5	15.9	13.15	13.15	12.55
	Ni		190	160	23	32	103.4	82.9	120.7	64.4	109.7		365	295	270	288	286		100	154	214	152	185	193	170		214	220	151			204	230		230	186	242	270	132	143	113	160		144	170	16	38	38	54
	Rb												1.1	1.6																										0.88
	Sr		140	130	2.3	21	109	124	104	101.1	123.1		167	158	140	145	147		118	140	148	152	149	141		130	100	171	150			182	217		176	209	202	245	268	440	190	300		171	127	122	137	137	143
	Y				1.1	1.2																																		9.6
	Nb																																							2.26
	Cs												0.049	0.038		100				0.059																	0.049	0.12	0.043	0.022		66
	Ba		30	25			11.5	12.2	10.8	9.3	11.2		51	41	42	42	35		34	29	30	32	36	38	40	38	30	30	26			32	28		240	117	150	240	257	1203	140	820		30	30	13.7	17	17	40
	La		2	1.7		0.21	0.683	0.651	0.514	0.624	0.417		4.04	3.35	3.7	3.17	3.17		3.24	2.16	2.24	2.95	2.55	2.59	2.16	2.06	2.17	2.51	1.93			2.59	2.62		2.65	2.25	2.21	2.44	2.22	3.52		2.5		1.523	1.55	0.64	0.791	0.791	0.921
	Ce		5	4		0.62	1.69	1.65	1.306	1.582	1.056		9.63	8.73	8.8	7.9	7.2		8.76	5	5.7	7.4	6.6	6.7	5.6	5.2	4	4.65	5.18			5.9	5.6		6.6	5.3	5.83	7.25	5.52	7.62		5.3		3.99	3.5	1.69	2.17	2.17	2.48
	Pr																																							1.07
	Nd		3.3	3		0.6	1.2	1.03	0.84	1.04	0.67		5.55	5.3	5.7	4.7	4		5.24	3	3.6	4.7	4.3	3.6	3.5	3.2	3.5	3.6	3			3.7	3.4		4.2	3.3	3.2	3.25	3.3	4.85		2.6		2.5	2.45	1.17	1.6	1.6	1.6
	Sm		1	0.85	0.37	0.33	0.408	0.352	0.298	0.377	0.224		1.61	1.623	1.63	1.48	1.44		1.56	0.96	1.11	1.44	1.25	1.24	1.08	1.01	1.23	1.15	0.975			1.06	1.02		1.22	1.01	1.015	1.15	0.894	1.33		0.93		0.788	0.77	0.4	0.489	0.489	0.526
	Eu		0.75	0.7		0.54	0.543	0.578	0.49	0.498	0.579		0.86	0.83	0.79	0.78	0.84		0.723	0.72	0.75	0.791	0.77	0.762	0.8	0.76	0.704	0.72	0.734			1.01	0.94		0.86	0.74	0.7949	0.73	0.717	1.02		0.78		0.75	0.79	0.56	0.658	0.658	0.682
	Gd												2.1												1.3	1.3	1.65	1.6												1.48
	Tb		0.2	0.18			0.094	0.08	0.0698	0.0887	0.0481		0.41	0.326	0.35	0.31	0.29		0.33	0.26	0.26	0.33	0.29	0.3	0.26	0.21	0.28	0.22	0.227			0.217	0.207		0.25	0.21	0.206	0.24	0.18	0.27		0.21		0.161	0.172	0.12	0.123	0.123	0.129
	Dy		1.3	1.2	0.44	0.54							2.47			2.04	1.8		2.22	1.4					1.6	1.45	1.96	1.6					1.3		1.81	1.5				1.62		1.36			1.3
	Ho						0.136	0.122	0.103	0.14	0.058				0.51	0.38	0.37		0.48	0.28															0.37	0.26		0.3		0.34		0.25			0.21
	Er				0.34	0.33																																		1
	Tm		0.13	0.12									0.2						0.23						0.16	0.16	0.2	0.15												0.14
	Yb		0.86	0.74	0.41	0.24	0.42	0.354	0.311	0.406	0.224		1.27	1.212	1.25	1.12	1.14		1.34	0.95	0.97	1.17	1.08	1.03	1.12	0.95	1.05	0.12	0.896			0.9	0.85		1	0.79	0.82	0.91	0.689	0.9		0.73		0.634	0.67	0.62	0.548	0.548	0.57
	Lu		0.13	0.11			0.0621	0.0524	0.0466	0.0602	0.0327		0.19	0.169	0.179	0.16	0.17		0.19	0.135	0.143	0.174	0.159	0.155	0.17	0.14	0.159	0.138	0.127			0.127	0.121		0.143	0.11	0.1212	0.13	0.096	0.13		0.078		0.0904	0.097	0.1	0.081	0.081	0.084
	Zr		30	25			10.4	9.5	7.9	9.9	5.7		72	46	46	38	43			26	47	47	42	40		30	35	35	30			26			37		27	34	28	39.9				21		10.1	16	16	13
	Hf		0.7	0.55			0.271	0.243	0.204	0.267	0.138		1.24	1.17	1.16	1.08	1.06		1.11	0.73	0.85	1.03	0.93	0.93	0.78	0.85	0.92	1.33	0.73			0.74	0.7		0.84	0.78	0.738	0.85	0.628	0.69		0.65		0.582	0.6	0.3	0.33	0.33	0.34
	Ta		0.1	0.075			0.031	0.04	0.027	0.031	0.016		0.18	0.149	0.156	0.148	0.13		0.16	0.078	0.103	0.128	0.107	0.108	0.1	0.12	0.2	0.1	0.099			0.081	0.086		0.13	0.114	0.099	0.11	0.12	0.2		0.107		0.066	0.092	0.02	0.043	0.043	0.045
	Th		0.32	0.25			0.087	0.0782	0.0594	0.0767	0.038		0.81	0.52	0.55	0.57	0.44		0.43	0.28	0.31	0.36	0.33	0.29	0.39	0.29	0.34	0.34	0.291			0.37	0.417		0.38	0.38	0.364	0.43	0.302	0.39		0.37		0.24	0.23	0.04	0.099	0.099	0.118
	U						0.025	0.03	0.026	0.025	0.021		0.19	0.14	0.138	0.11	0.1		0.14	0.079	0.1	0.13	0.12	0.3	0.1	0.09		0.1	0.09			0.07	0.099		0.069	0.16	0.181	0.21	0.29	0.47		0.58		0.08	0.052	0.02	0.04	0.04	0.03
(ppb)	Os
	Ir		6.1	6			1.34	1.13	3.34	2.81	1.15		19.6	16	11.2	22	14.2		5.9	6.4	9.7	4.5	6.6	4	6	6.6	6.3	6.8	5.5			14	10.8		10.4	9.8	10.5	12	4.2		4	5.3		5.3	5.9		1.8	1.8	1.5
	Ru
	Pt
	Rh
	Pd
	Au		2.4	1.4			0.21	0.38	3.71	1.93	0.37		4.5	4	4.5	5.1	4.6		1.3		1.8	1.4	3.4	4.2	2.5		3.6	7.3	1.5			4.4	2.2		7	4.6	62	4.3	26			2.3		3.4	2.8		0.2	0.2	1.5
	Re
																																								1.35
															2.92867																									0.051
	Reference		Laul et al 1983	Laul et al 1983	Treiman et al 2010	Treiman et al 2010	Goodrich et al 1984	Goodrich et al 1984	Goodrich et al 1984	Goodrich et al 1984	Goodrich et al 1984		Koeberl et al 1996	Korotev et al 1996	Warren 2005	Warren 2005	Warren 2005		Ostertag et al 1986	Warren and Kallemeyn 1986	Lindstrom et al 1986	Lindstrom et al 1986	Lindstrom et al 1986	Lindstrom et al 1986	Fukuoka et al 1986	Fukuoka et al 1986	Koeberl 1988		Korotev et al 2003			Warren and Kallemeyn 1991			Warren 2005	Warren 2005	Korotev et al 2003	Bischoff et al 1998	Korotev et al 2003	Joy et al 2010	Zipfel et al 1998	Warren 2005		Korotev et al 2003	Warren 2005	McLeod et al 2016	Hudgins et al 2011a,b	Hudgins et al 2011	Hudgins et al 2011a,b
	Method		INAA	INAA	SIMS - mode recalc	SIMS - mode recalc	INAA	INAA	INAA	INAA	INAA		INAA	INAA	INAA	INAA	INAA		INAA	INAA	INAA	INAA	INAA	INAA	INAA	INAA	INAA	INAA	INAA			INAA	INAA		INAA	INAA	INAA	INAA	INAA	ICP-MS	major XRF trace INAA	INAA		INAA	INAA	LA-ICP-MS - min mode recalc	LA-ICP-MS - min mode recalc	INAA	LA-ICP-MS - min mode recalc
	Mass (mg)		20.5	9.3	n/a	n/a	not reported	not reported	not reported	not reported	not reported		58	281	267	268	261		59.3	197	36.35	21.62	30.34	8.22	21.4	23.2	11.69	52.6	41.6			59	22		126	231	46.9	240	92.7	140	120	146		334.5	186	n/a	n/a	304	n/a
[truncated: 68 more columns]

## Sheet: References
Apollo Samples															Meteorite Samples
